# Supplementary material for: Enhancement of the advanced Fenton process by weak magnetic field for the degradation of 4-nitrophenol
Source: Royal Society of Chemistry journal article supplement (doi:10.1039/c4ra16318d), 2015-01-01
Supplement: c4ra16318d1.pdf [file c4ra16318d1.pdf]

## Supplementary Data

Enhancement of advanced Fenton process by weak magnetic field for the degradation of 4-nitrophenol

Xinmei Xiong,<sup>a,b</sup> Yuankui Sun,<sup>a</sup> Bo Sun,<sup>a</sup> Weihua Song,<sup>c</sup> Jingyi Sun,<sup>a</sup> Naiyun Gao,<sup>a</sup> Junlian Qiao,<sup>a</sup> Xiaohong Guan<sup>a,\*</sup>

<sup>a</sup>State Key Laboratory of Pollution Control and Resources Reuse, College of Environmental Science and Engineering, Tongji University, Shanghai 200092, P. R. China

<sup>b</sup>Department of Civil Engineering, Jiujiang University, Jiujiang 332005, Jiangxi, China

<sup>c</sup>Department of Environmental Science & Engineering, Fudan University, Shanghai, P. R. China

\*Corresponding author contact information:

Xiaohong Guan, Email: [guanxh@tongji.edu.cn](mailto:guanxh@tongji.edu.cn), Phone: +86-21-65980956

Number of pages (including this page): 18

Number of Texts: 1

Number of Figures: 10

**Text S1**

To identify the existence of hydroxyl radicals, the electron paramagnetic resonance (EPR) signals of radicals trapped by 5,5-dimethyl-1-pyrroline-1-oxide (DMPO) were obtained using an EPR spectrometer (Bruker A200 ESP 300E) equipped with a Quanta-ray Nd/YAG laser system and an irradiation light source ( $\lambda = 355$  nm) at ambient temperature. The experimental condition was: the center field of 338.2 mT, sweep width of 5 mT, a sweep time of 110 s, microwave frequency of 9.80 GHz, and microwave power of 5.65 mW.

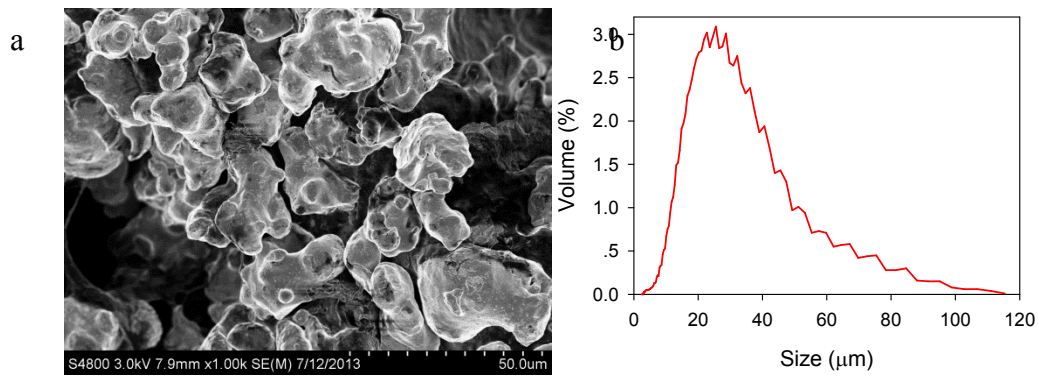

Fig. S1. (a) SEM image and (b) Particle size distribution of  $\text{Fe}^0$  employed in this study.

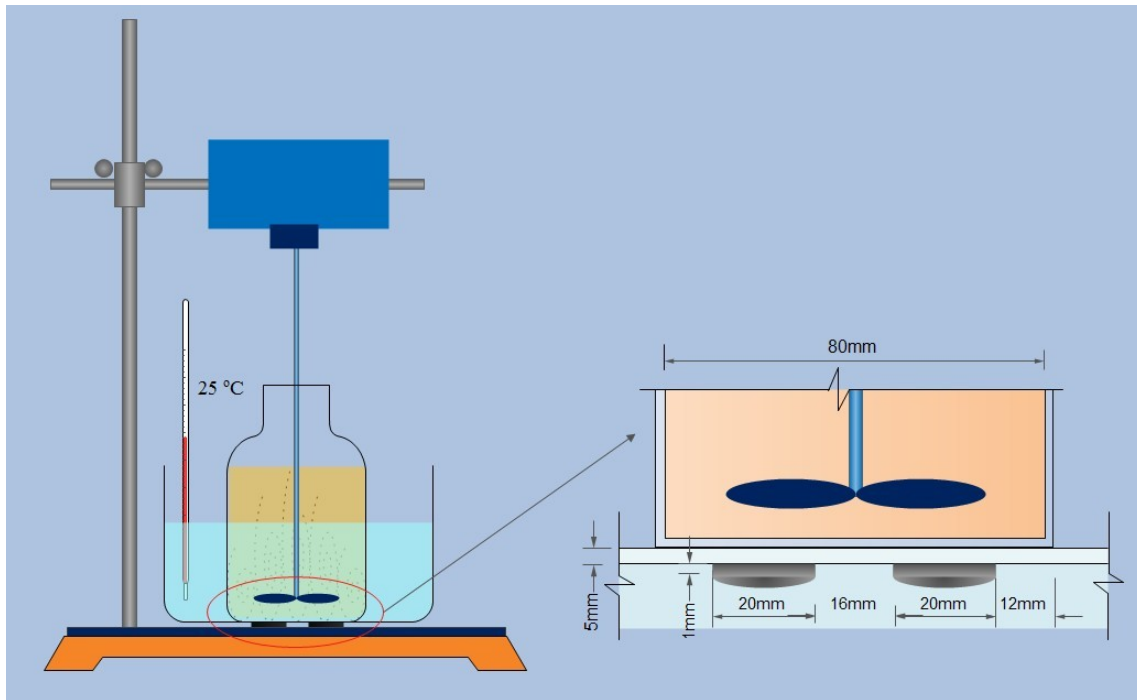

Fig. S2. The experimental setup of nonuniform MF.

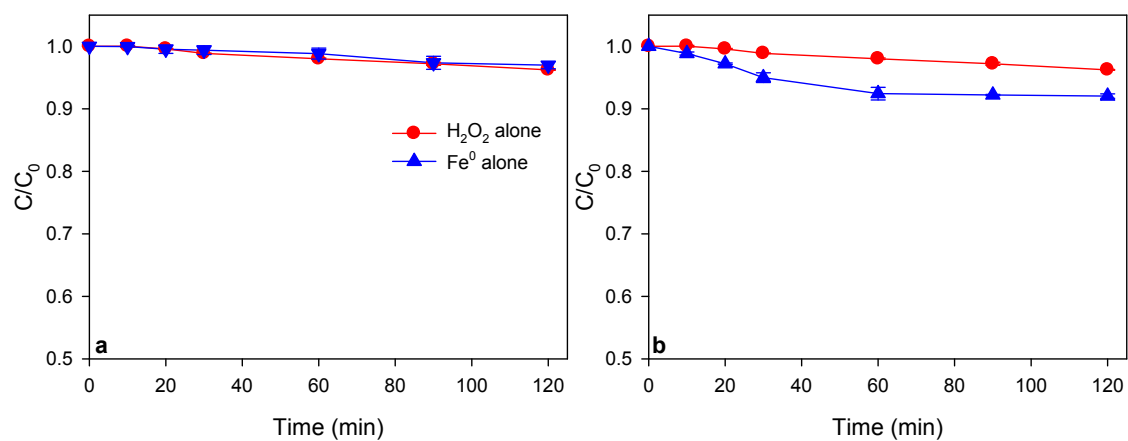

Fig. S3. Removal of 4-NP by  $H_2O_2$  alone or  $Fe^0$  alone (a, without WMF; b, with WMF). Reaction conditions:  $[4-NP]_0 = 0.02$  mM,  $[H_2O_2]_0 = 0.5$  mM,  $[Fe^0]_0 = 0.5$  mM,  $pH_{ini} = 4.0$ ,  $T = 25$  °C.

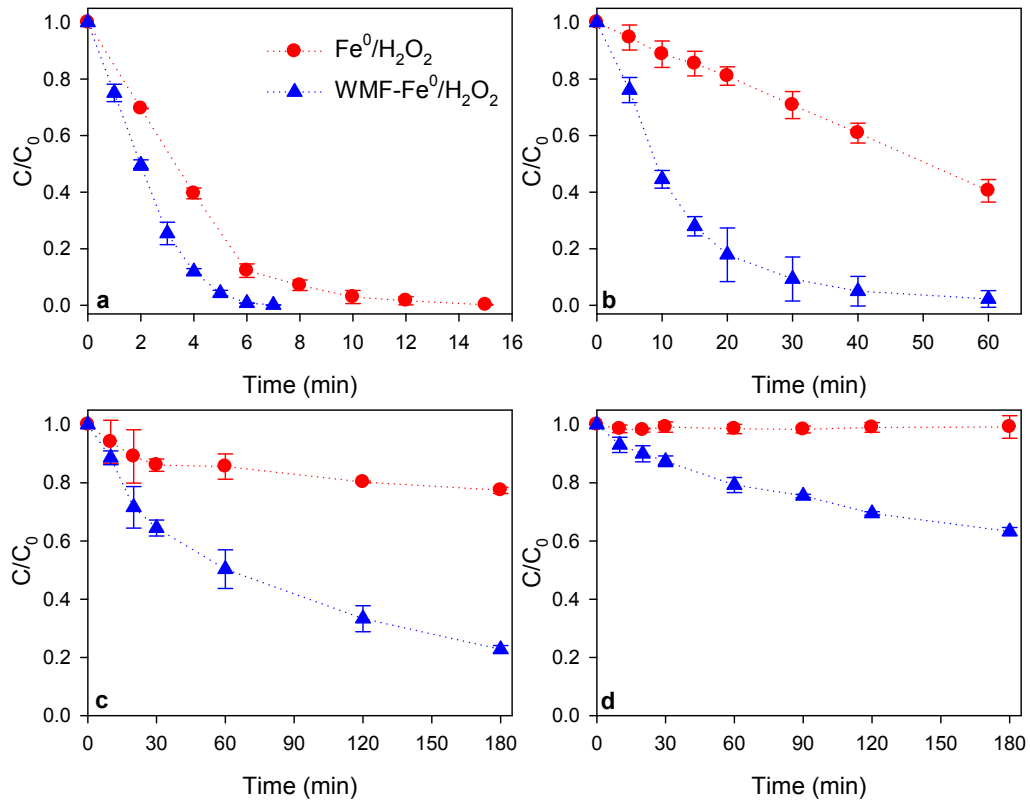

Fig. S4. Influence of WMF on 4-NP removal by  $\text{Fe}^0/\text{H}_2\text{O}_2$  system at different  $\text{pH}_{\text{ini}}$  levels (a,  $\text{pH}_{\text{ini}} = 3.0$ ; b,  $\text{pH}_{\text{ini}} = 4.0$ ; c,  $\text{pH}_{\text{ini}} = 5.0$ ; d,  $\text{pH}_{\text{ini}} = 6.0$ ). Reaction conditions:  $[\text{4-NP}]_0 = 0.02 \text{ mM}$ ,  $[\text{H}_2\text{O}_2]_0 = 0.5 \text{ mM}$ ,  $[\text{Fe}^0]_0 = 0.5 \text{ mM}$ ,  $T = 25 \text{ }^\circ\text{C}$ .

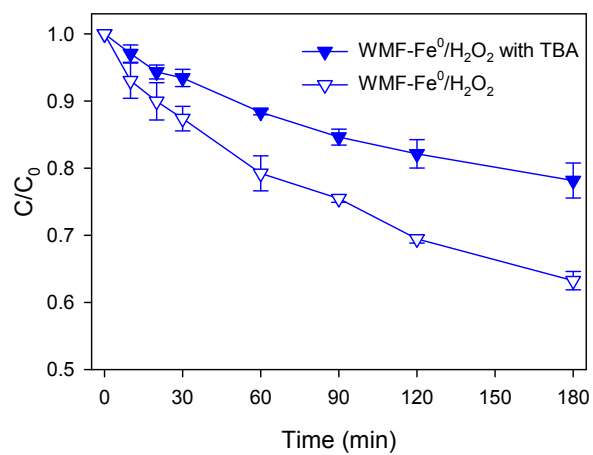

Fig. S5. Effect of radical quenching agent on 4-NP removal in WMF-Fe<sup>0</sup>/H<sub>2</sub>O<sub>2</sub> system at pH<sub>ini</sub> 6.0. Reaction conditions: [TBA]<sub>0</sub> = 0.1 M, [4-NP]<sub>0</sub> = 0.02 mM, [H<sub>2</sub>O<sub>2</sub>]<sub>0</sub> = 0.5 mM, [Fe<sup>0</sup>]<sub>0</sub> = 0.5 mM, T = 25 °C.

Fig. S6. (a) The MF strength distributions of the plane parallel to the applied uniform MF (with the applied flux densities of 5 mT, 10 mT and 20 mT, respectively) and through the center of a Fe<sup>0</sup> sphere; (b) The MF gradients around a Fe<sup>0</sup> sphere when the flux densities of applied MF are 5 mT, 10 mT and 20 mT, respectively. The arrow shows the direction of the applied uniform MF.



Fig. S7 Aggregation of Fe<sup>0</sup> particles under a uniform MF of 50 mT.

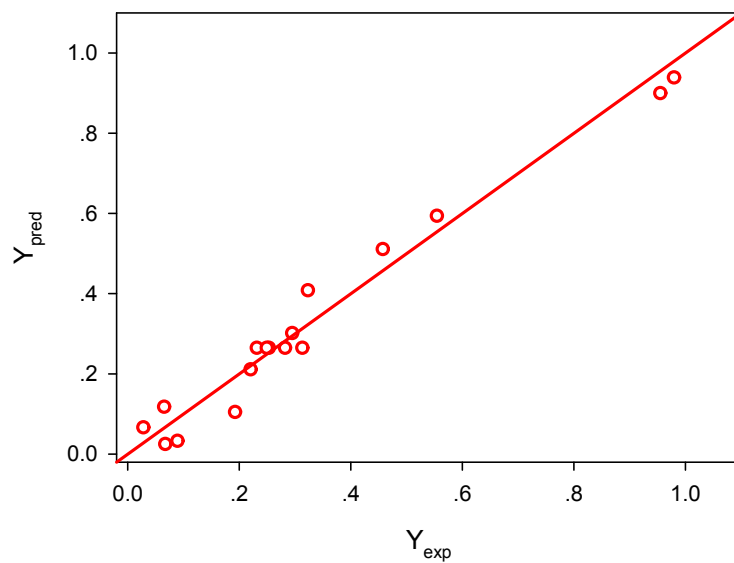

Fig. S8. Comparison between the calculated and experimental values of the output.

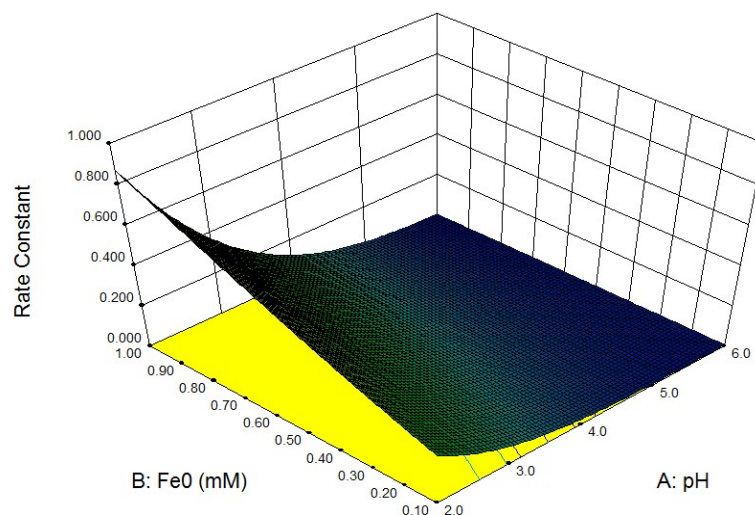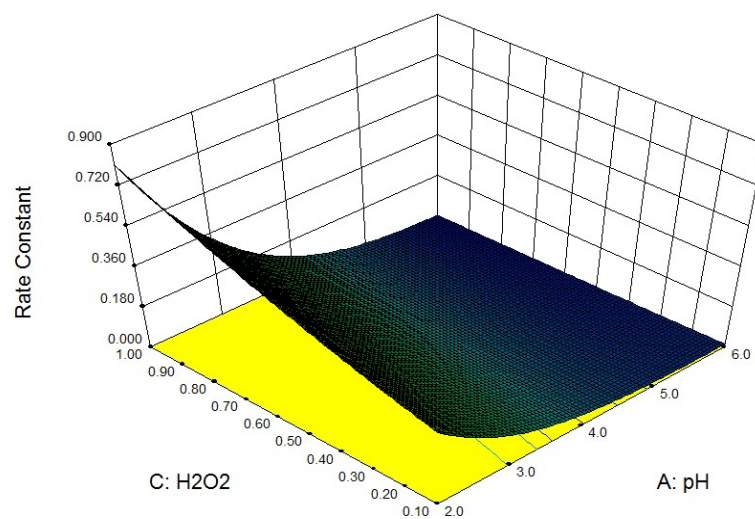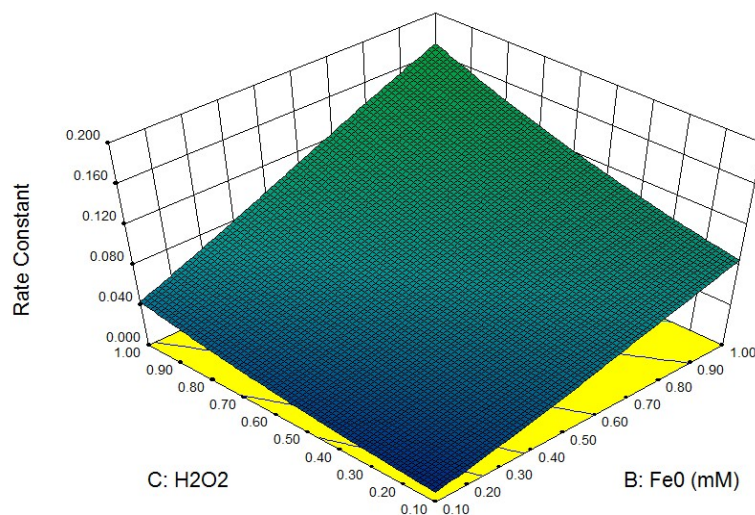

Fig. S9. Response surface plots of the rate constant of 4-NP for the three most important pair of factors.

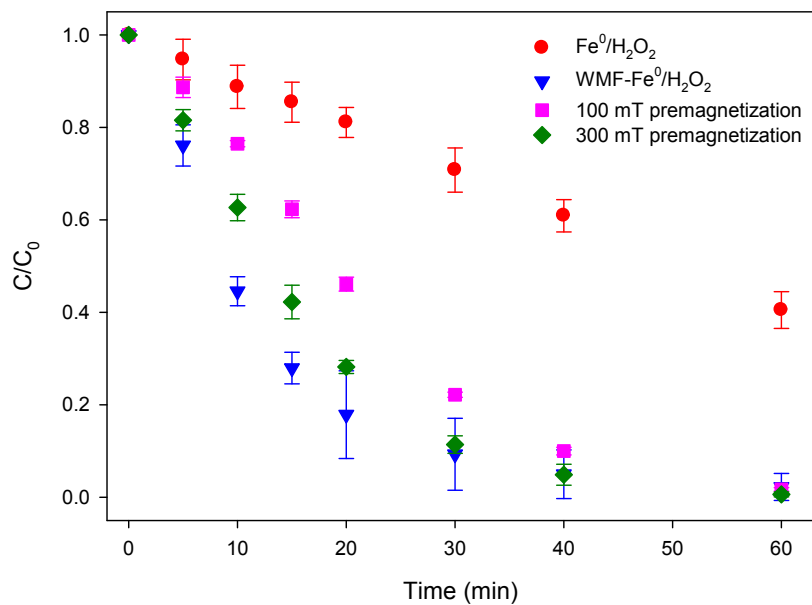

Fig. S10. Influence of premagnetization on 4-NP removal by  $Fe^0/H_2O_2$ . Reaction conditions:  $[4-NP]_0 = 0.02$  mM,  $[H_2O_2]_0 = 0.5$  mM,  $[Fe^0]_0 = 0.5$  mM,  $pH_{ini} = 4.0$ ,  $T = 25$  °C.

**Table S1** Details of the LC-MS/MS gradient program.

| Time (min) | 0.1% FA-Water (%) | 0.1% FA-Acetonitrile (%) | Flow rate (mL min <sup>-1</sup> ) |
|------------|-------------------|--------------------------|-----------------------------------|
| 0          | 95                | 5                        | 0.4                               |
| 1          | 80                | 20                       | 0.4                               |
| 3          | 55                | 45                       | 0.4                               |
| 6          | 0                 | 100                      | 0.4                               |
| 9          | 0                 | 100                      | 0.4                               |
| 9.5        | 95                | 5                        | 0.4                               |
| 11.5       | 95                | 5                        | 0.4                               |

**Table S2** Experimental range and levels of the independent variables.

| Independent factors                  | Units | Symbol | Coded levels |      |      |
|--------------------------------------|-------|--------|--------------|------|------|
|                                      |       |        | -1           | 0    | +1   |
| pH                                   | -     | A      | 2.0          | 4.0  | 6.0  |
| Fe <sup>0</sup> dosage               | mM    | B      | 0.10         | 0.55 | 1.00 |
| H <sub>2</sub> O <sub>2</sub> dosage | mM    | C      | 0.10         | 0.55 | 1.00 |

**Table S3** ANOVA test for response function Y.

| Source                          | Sum of squares | d.f. | Mean square | F-ratio  | P-value  |
|---------------------------------|----------------|------|-------------|----------|----------|
| Model                           | 1.1863         | 9    | 0.1318      | 24.6245  | 0.0002   |
| A-pH                            | 0.9086         | 1    | 0.9086      | 169.7338 | < 0.0001 |
| B-Fe <sup>0</sup>               | 0.0777         | 1    | 0.0777      | 14.5089  | 0.0066   |
| C-H <sub>2</sub> O <sub>2</sub> | 0.0263         | 1    | 0.0263      | 4.9114   | 0.0622   |
| AB                              | 0.0532         | 1    | 0.0532      | 9.9293   | 0.0161   |
| AC                              | 0.0397         | 1    | 0.0397      | 7.4121   | 0.0297   |
| BC                              | 0.0000         | 1    | 0.0000      | 0.0000   | 0.9992   |
| A <sup>2</sup>                  | 0.0799         | 1    | 0.0799      | 14.9273  | 0.0062   |
| B <sup>2</sup>                  | 0.0010         | 1    | 0.0010      | 0.1774   | 0.6862   |
| C <sup>2</sup>                  | 0.0002         | 1    | 0.0002      | 0.0380   | 0.8511   |
| Residual                        | 0.0375         | 7    | 0.0054      |          |          |
| Lack of Fit                     | 0.0334         | 3    | 0.0111      | 10.7975  | 0.0218   |
| Pure Error                      | 0.0041         | 4    | 0.0010      |          |          |
| Cor Total                       | 1.2238         | 16   |             |          |          |

**Table S4** Comparison of the experimental and predicted values of the response for different experimental points.

| pH   | Fe <sup>0</sup> (mM) | H <sub>2</sub> O <sub>2</sub> (mM) | Sqrt( <i>k</i> <sub>obs</sub> ) |           |
|------|----------------------|------------------------------------|---------------------------------|-----------|
|      |                      |                                    | Observed                        | Predicted |
| 3.75 | 1.00                 | 0.10                               | 0.3028                          | 0.3455    |
| 3.75 | 0.55                 | 0.55                               | 0.2559                          | 0.3064    |
| 5.50 | 0.55                 | 1.00                               | 0.0678                          | 0.0717    |



**Table S5** Summary of intermediates detected in various processes for 4-NP oxidation (“√” stands for detected and “-” stands for non-detected).

| MW (m/z) | Chemical structure                                                                  | Ultrasonic Irradiatio <sup>33</sup> | Electro-Fenton <sup>31</sup> | Plasma-TiO <sub>2</sub> <sup>34</sup> | UV/H <sub>2</sub> O <sub>2</sub> <sup>32</sup> | Photo-Fenton <sup>35</sup> | Wet electrocatalytic oxidation <sup>36</sup> | Ozonatio <sup>37</sup> | WMF-Fe <sup>0</sup> /H <sub>2</sub> O <sub>2</sub> (This study) |
|----------|-------------------------------------------------------------------------------------|-------------------------------------|------------------------------|---------------------------------------|------------------------------------------------|----------------------------|----------------------------------------------|------------------------|-----------------------------------------------------------------|
| 139      | 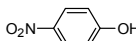   |                                     |                              |                                       | √ Detected                                     | - Undetected               |                                              |                        |                                                                 |
| 94       |    | -                                   | -                            | √                                     | -                                              | -                          | -                                            | √                      | -                                                               |
| 108      |    | √                                   | √                            | √                                     | √                                              |                            | √                                            | √                      | -                                                               |
| 108      |    | -                                   | -                            | -                                     | -                                              | -                          | -                                            | √                      | -                                                               |
| 109      |    | √                                   | -                            | √                                     | -                                              | -                          | -                                            |                        | -                                                               |
| 110      |    | √                                   | √                            | √                                     | √                                              |                            | √                                            | √                      | -                                                               |
| 110      |    | -                                   | -                            | √                                     | -                                              | -                          | -                                            | √                      | -                                                               |
| 123      |  | -                                   | -                            | -                                     | -                                              | -                          | -                                            | -                      | √                                                               |
| 124      |  | -                                   | -                            | -                                     | -                                              | -                          | √                                            | -                      | -                                                               |
| 126      |  | -                                   | √                            | -                                     | √                                              | -                          | √                                            | -                      | -                                                               |
| 153      |  | -                                   | -                            | -                                     | -                                              | √                          | -                                            | -                      | -                                                               |

|     |                                                                                   |   |   |   |   |   |   |   |   |   |
|-----|-----------------------------------------------------------------------------------|---|---|---|---|---|---|---|---|---|
| 154 | 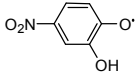 | - | - | - | - | - | - | - | - | ✓ |
| 154 |  | - | - | - | - | - | - | - | - | ✓ |
| 155 |  | ✓ | ✓ | - | ✓ | ✓ | ✓ | - | - | ✓ |
| 171 |  | - | ✓ | - | ✓ | - | - | - | - | ✓ |
| 189 |  | - | - | ✓ | - | - | - | - | - | - |

---
